# Supplementary material for: Genetically manipulated phages with improved pH resistance for oral administration in veterinary medicine
Source: PubMed Central journal article supplement (PMC5157022; doi:10.1038/srep39235), 2016-12-15
Supplement: srep39235-s1.pdf [file srep39235-s1.pdf]

## **Supplementary Information**

### **Genetically manipulated phages with improved pH resistance for oral administration in veterinary medicine**

Franklin L. Nobrega<sup>1</sup>, Ana Rita Costa<sup>1</sup>, José F. Santos<sup>1</sup>, Melvin F. Siliakus<sup>2</sup>, Jan W. M. van Lent<sup>3</sup>, Servé W. M. Kengen<sup>2</sup>, Joana Azeredo<sup>1,\*</sup>, Leon D. Kluskens<sup>1</sup>

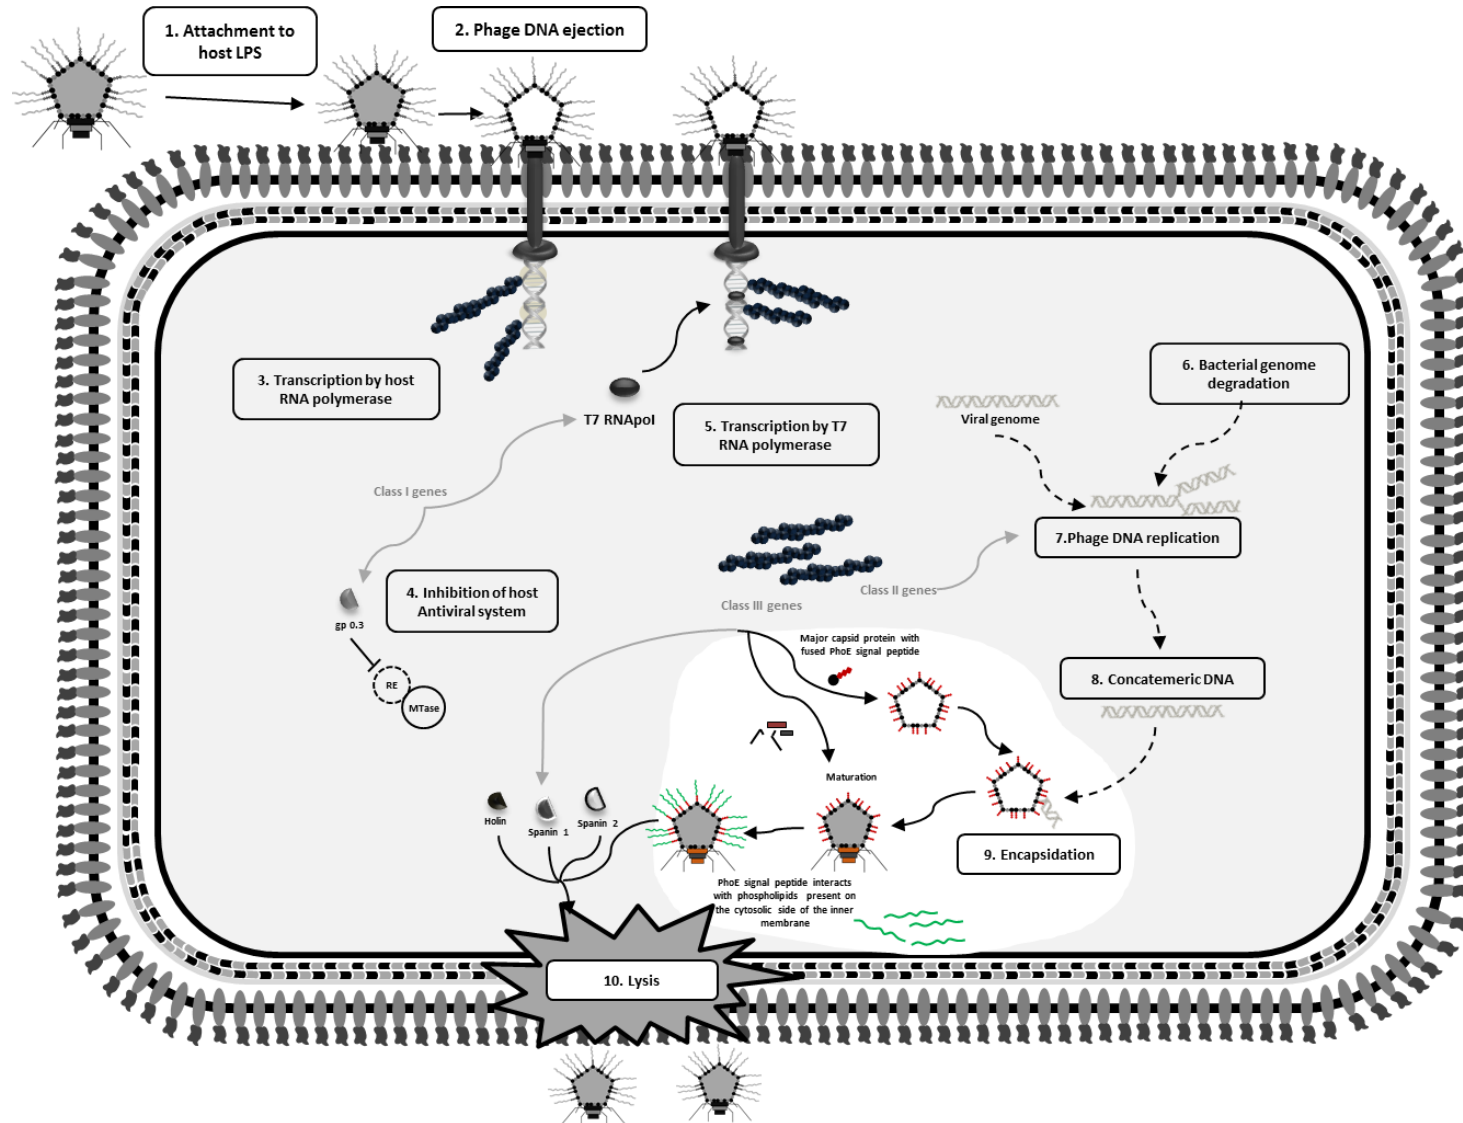

**Supplementary Figure S1. Replication of T7::PhoE inside *Escherichia coli*.** During replication inside the bacteria, phage T7::PhoE, due to the presence of the PhoE signal peptide on the capsid, signals the incorporation of phospholipids synthesized at the cytoplasmic side of the inner membrane, creating a phospholipid coating.

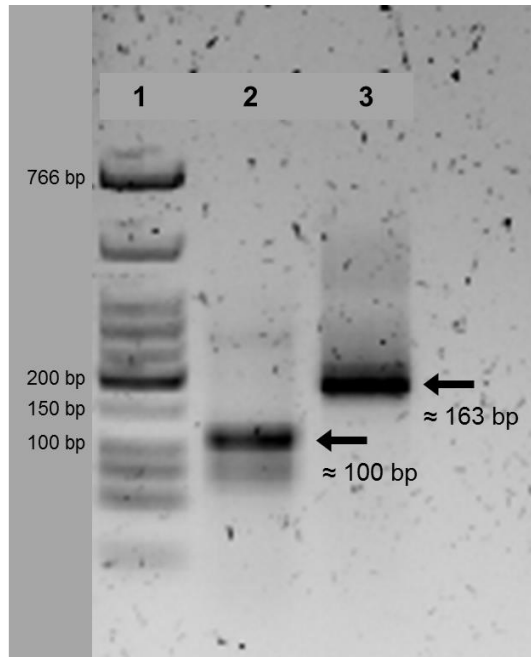

**Supplementary Figure S2. PCR confirmation of PhoE signal peptide sequence insertion in phage T7 genome.** Lane 1 – Low molecular weight ladder (NEB); Lane 2 – Wild-type T7; and Lane 3 – T7::PhoE. Expected size of approximately 100 bp for wild type T7 and 163 bp for T7::PhoE, run in a 1% SGTB agarose gel.

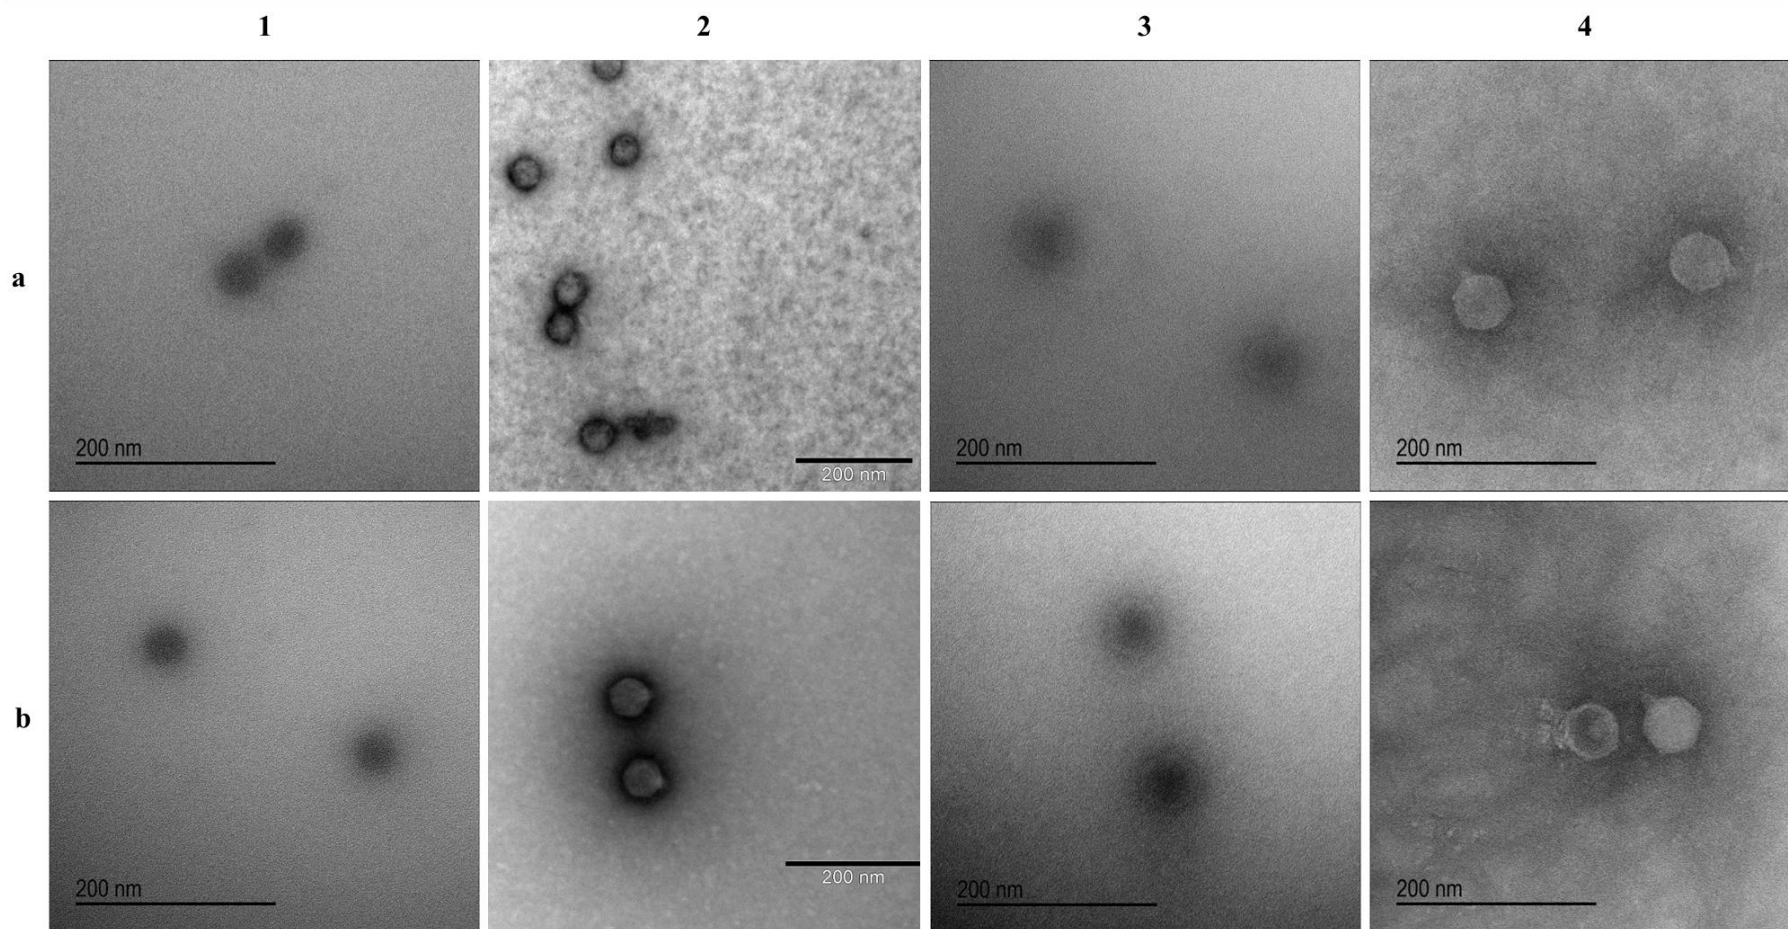

**Supplementary Figure S3. Transmission electron microscopy images of the phages.** a) wild-type T7 and b) mutant T7::PhoE phages. Images of the phages in a 400 mesh copper grid with a carbon film with 1) no treatment, 2) uranyl acetate negative staining, 3) osmium tetroxide vapours for 1.5h and 4) 10 min glutaraldehyde/paraformaldehyde fixation with with osmium tetroxide vapours for 1.5h.

**Supplementary Table S1. Primers used to construct the recombineering substrate for BRED and to confirm the mutation.**

| PRIMER       | SEQUENCE (5' – 3') <sup>a,b</sup>                                                                                    |                                                           |
|--------------|----------------------------------------------------------------------------------------------------------------------|-----------------------------------------------------------|
| PhoE.fw      | <u>GTGGTCTTCGCCCAGAAAGCTGCTGGTGCAGTGGTTTT</u><br><u>CAAAGTGGAGTAA</u> ATGAAGAAATCTACGTTGGCACTT<br><b>GTCGTGATGGG</b> | To construct PhoE<br>recombineering substrate for<br>BRED |
| PhoE.rv      | <u>AACACTCGCCTCTTCGGGACTAGCAGCGACCGTTGAG</u><br><u>GCCACCCCAGCAAGCCTGAACAGACGCACTTGCCAC</u><br>GATGCCCATCACG         |                                                           |
| PhoE.conf.fw | GTGGTCTTCGCCCAGAA                                                                                                    | To confirm the presence of                                |
| PhoE.conf.rv | AACACTCGCCTCTTCGG                                                                                                    | the PhoE signal peptide on<br>the mutant phages           |

<sup>a</sup> Underlined are the homology regions for the T7 major coat protein

<sup>b</sup> **Bold** is the overlapping region of the primers
